# Supplementary figures and images for: Colletotrichum Species Causing Anthracnose of Citrus in Australia
Source: MDPI journal article supplement (doi:10.3390/jof7010047), 2021-01-12

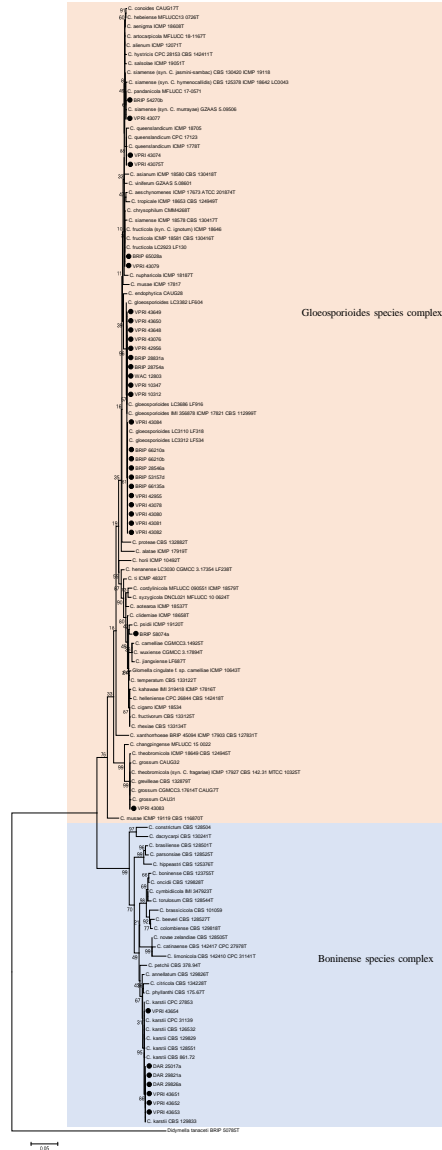

Supplement: s1 [file s1]
